# Supplementary material for: RIP-Seq Suggests Translational Regulation by L7Ae in Archaea
Source: PubMed Central journal article supplement (PMC5539422; doi:10.1128/mbio.00730-17), 2017-08-01

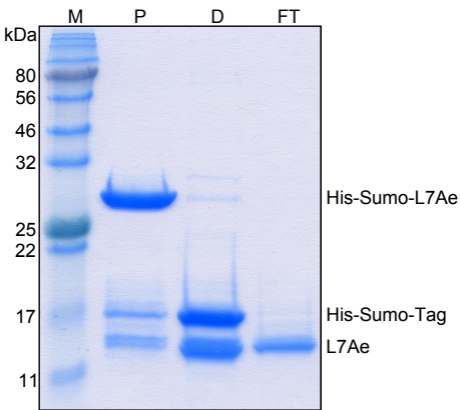

Supplement: mbo004173413sf3.pdf [file mbo004173413sf3.pdf]
